# Supplementary material for: Rare Species Support Vulnerable Functions in High-Diversity Ecosystems
Source: PLoS Biol. 2013 May 28;11(5):e1001569. doi: 10.1371/journal.pbio.1001569 (PMC3665844; doi:10.1371/journal.pbio.1001569)
Supplement: Table S1 — Number of species for each statistical analysis, each scale, each dataset, and each functional vulnerability level if any. (XLSX) [file pbio.1001569.s003.xlsx]

## Sheet: Feuil1
		Test	Figure	Scale	Dataset	Samples size (number of species)
					Reef fish	633
		Distinctivness vs. Commonness	1	Local	Alpine plants	2535
					Tropical trees	659
					Reef fish	846
		Distinctivness vs. Commonness	1	Regional	Alpine plants	2979
					Tropical trees	662
					Reef fish	633
		Vulnerability vs. Commonness	2	Local	Alpine plants	2535
					Tropical trees	659
					Reef fish	846
		Vulnerability vs. Commonness	2	Regional	Alpine plants	2979
					Tropical trees	662
					Reef fish	32	126	159	316
		Vulnerability vs. Rarity	3A	Local	Alpine plants	127	507	634	1267
					Tropical trees	33	131	165	330
					Reef fish	42	169	212	423
		Vulnerability vs. Rarity	3B	Regional	Alpine plants	149	596	744	1490
					Tropical trees	33	132	166	331
